# Supplementary material for: Using Transcriptome Analysis to Identify Genes Involved in Switchgrass Flower Reversion
Source: Front Plant Sci. 2018 Dec 4;9:1805. doi: 10.3389/fpls.2018.01805 (PMC6288819; doi:10.3389/fpls.2018.01805)
Supplement: Supplementary file 4 [file Table_4.XLSX]

## Sheet: Sheet1
Table S4 kegg pathways involved in switchgrass flower reversion
gene_id	ref_gene_name	regulation	KEGG	Pathway		Pathway ID	Pathway	All genes	DEG Count	p-value	Corrected p-value
MSTRG.8855	-	down	K01835/pgm; phosphoglucomutase [EC:5.4.2.2]	ko00010, ko00030, ko00052, ko00230, ko00500, ko00520, ko00521		ko00940	Phenylpropanoid biosynthesis	368	12	3.64883e-07	4.02e-06
MSTRG.29669	Pavir.5KG036300	down	K03504/POLD3; DNA polymerase delta subunit 3	ko00230, ko00240, ko03030, ko03410, ko03420, ko03430, ko03440		ko04075	Plant hormone signal transduction	441	9	0.062	0.193
MSTRG.38328	-	down	K00264/GLT1; glutamate synthase (NADPH/NADH) [EC:1.4.1.13 1.4.1.14]	ko00250, ko00910		ko04626	Plant-pathogen interaction	320	8	0.017	0.062
MSTRG.10361	-	down	K11420/EHMT; euchromatic histone-lysine N-methyltransferase [EC:2.1.1.43]	ko00310		ko04016	MAPK signaling pathway - plant	175	6	0.023	0.085
MSTRG.25576	-	down	K00921/PIKFYVE; 1-phosphatidylinositol-3-phosphate 5-kinase [EC:2.7.1.150]	ko00562, ko04070, ko04810		ko00480	Glutathione metabolism	197	5	0.004	0.017
MSTRG.53078	-	down	K13917/RNGTT; mRNA-capping enzyme [EC:2.7.7.50 3.6.1.-]	ko03015		ko00520	Amino sugar and nucleotide sugar metabolism	258	5	0.02	0.074
MSTRG.59586	Pavir.9KG401100	down	K14498/SNRK2; serine/threonine-protein kinase SRK2 [EC:2.7.11.1]	ko04016, ko04075		ko00062	Fatty acid elongation	72	4	0.000326	0.002
MSTRG.48663	Pavir.7KG369900	up	K01785/galM; aldose 1-epimerase [EC:5.1.3.3]	ko00010, ko00052		ko00908	Zeatin biosynthesis	49	4	0.007	0.028
MSTRG.57762	Pavir.9KG150800	up	K07407/E3.2.1.22B; alpha-galactosidase [EC:3.2.1.22]	ko00052, ko00561, ko00600, ko00603		ko00980	Metabolism of xenobiotics by cytochrome P450	121	4	0.017	0.069
MSTRG.8171	Pavir.1NG562500	up	K15397/KCS; 3-ketoacyl-CoA synthase [EC:2.3.1.199]	ko00062		ko00982	Drug metabolism - cytochrome P450	131	4	0.018	0.075
MSTRG.65682	Pavir.9NG552000	up	K15397/KCS; 3-ketoacyl-CoA synthase [EC:2.3.1.199]	ko00062		ko00983	Drug metabolism - other enzymes	155	4	0.022	0.088
MSTRG.66546	Pavir.9NG570600	up	K15397/KCS; 3-ketoacyl-CoA synthase [EC:2.3.1.199]	ko00062		ko04070	Phosphatidylinositol signaling system	123	4	0.017	0.022
MSTRG.68965	Pavir.J134100	up	K15397/KCS; 3-ketoacyl-CoA synthase [EC:2.3.1.199]	ko00062		ko00052	Galactose metabolism	108	3	0.02	0.065
MSTRG.50673	-	up	K00759/APRT; adenine phosphoribosyltransferase [EC:2.4.2.7]	ko00230		ko00230	Purine metabolism	288	3	0.054	0.079
MSTRG.48922	Pavir.7NG020900	up	K16904/DCTPP1; dCTP diphosphatase [EC:3.6.1.12]	ko00240		ko00561	Glycerolipid metabolism	129	3	0.024	0.048
MSTRG.38499	-	up	K15918/GLYK; D-glycerate 3-kinase [EC:2.7.1.31]	ko00260, ko00561, ko00630		ko00941	Flavonoid biosynthesis	58	3	8.21505e-09	1.0924e-07
MSTRG.51213	Pavir.7NG301900	up	K20772/ACS1_2_6; 1-aminocyclopropane-1-carboxylate synthase 1/2/6 [EC:4.4.1.14]	ko00270, ko04016		ko04014	Ras signaling pathway	126	3	0.024	0.096
MSTRG.60977	Pavir.9KG641000	up	K10206/E2.6.1.83; LL-diaminopimelate aminotransferase [EC:2.6.1.83]	ko00300		ko04015	Rap1 signaling pathway	93	3	0.017	0.071
MSTRG.16127	Pavir.2NG493200	up	K01426/E3.5.1.4; amidase [EC:3.5.1.4]	ko00330, ko00360, ko00380, ko00627, ko00643		ko04020	Calcium signaling pathway	81	3	0.015	0.062
MSTRG.50289	Pavir.7NG180400	up	K18592/GGT1_5; gamma-glutamyltranspeptidase / glutathione hydrolase / leukotriene-C4 hydrolase [EC:2.3.2.2 3.4.19.13 3.4.19.14]	ko00430, ko00460, ko00480, ko00590		ko04022	cGMP-PKG signaling pathway	123	3	0.023	0.094
MSTRG.15397	Pavir.2NG374900	up	K01188/E3.2.1.21; beta-glucosidase [EC:3.2.1.21]	ko00460, ko00500, ko00940		ko04024	cAMP signaling pathway	137	3	0.026	0.104
MSTRG.13233	Pavir.2NG098000	up	K00799/GST; glutathione S-transferase [EC:2.5.1.18]	ko00480, ko00980, ko00982, ko00983		ko04114	Oocyte meiosis	234	3	0.044	0.178
MSTRG.18505	Pavir.3KG149600	up	K00799/GST; glutathione S-transferase [EC:2.5.1.18]	ko00480, ko00980, ko00982, ko00983		ko04218	Cellular senescence	187	3	0.035	0.142
MSTRG.29127	Pavir.4NG314600	up	K00799/GST; glutathione S-transferase [EC:2.5.1.18]	ko00480, ko00980, ko00982, ko00983		ko04371	Apelin signaling pathway	137	3	0.026	0.104
MSTRG.66835	Pavir.9NG622800	up	K00799/GST; glutathione S-transferase [EC:2.5.1.18]	ko00480, ko00980, ko00982, ko00983		ko00010	Glycolysis / Gluconeogenesis	249	2	0.07	0.093
MSTRG.32598	Pavir.5KG447000	up	K01183/E3.2.1.14; chitinase [EC:3.2.1.14]	ko00520		ko00240	Pyrimidine metabolism	223	2	0.062	0.071
MSTRG.32958	Pavir.5KG500300	up	K01183/E3.2.1.14; chitinase [EC:3.2.1.14]	ko00520		ko00460	Cyanoamino acid metabolism	78	2	0.07	0.212
MSTRG.38525	Pavir.5NG458800	up	K01183/E3.2.1.14; chitinase [EC:3.2.1.14]	ko00520		ko00500	Starch and sucrose metabolism	231	2	0.065	0.1
MSTRG.53886	Pavir.8KG291700	up	K01183/E3.2.1.14; chitinase [EC:3.2.1.14]	ko00520		ko00564	Glycerophospholipid metabolism	197	2	0.055	0.066
MSTRG.7966	Pavir.1NG503300	up	K07964/HPSE; heparanase [EC:3.2.1.166]	ko00531		ko00960	Tropane, piperidine and pyridine alkaloid biosynthesis	41	2	0.011	0.03
MSTRG.38376	Pavir.5NG422800	up	K18693/DPP1; diacylglycerol diphosphate phosphatase / phosphatidate phosphatase [EC:3.1.3.81 3.1.3.4]	ko00561, ko00564		ko04310	Wnt signaling pathway	126	2	0.035	0.144
MSTRG.57435	Pavir.9KG108500	up	K01126/E3.1.4.46; glycerophosphoryl diester phosphodiesterase [EC:3.1.4.46]	ko00564		ko04712	Circadian rhythm - plant	77	2	3.42991e-06	3.22732e-05
MSTRG.24834	-	up	K09680/coaW; type II pantothenate kinase [EC:2.7.1.33]	ko00770		ko00030	Pentose phosphate pathway	108	1	0.061	0.079
MSTRG.35624	Pavir.5NG047700	up	K00279/CKX; cytokinin dehydrogenase [EC:1.5.99.12]	ko00908		ko00250	Alanine, aspartate and glutamate metabolism	80	1	0.045	0.061
MSTRG.72247	Pavir.J496300	up	K00279/CKX; cytokinin dehydrogenase [EC:1.5.99.12]	ko00908		ko00260	Glycine, serine and threonine metabolism	116	1	0.065	0.08
MSTRG.47642	Pavir.7KG284900	up	K13495/CISZOG; cis-zeatin O-glucosyltransferase [EC:2.4.1.215]	ko00908		ko00270	Cysteine and methionine metabolism	176	1	0.099	0.113
MSTRG.47643	Pavir.7KG285000	up	K13495/CISZOG; cis-zeatin O-glucosyltransferase [EC:2.4.1.215]	ko00908		ko00300	Lysine biosynthesis	30	1	0.017	0.059
MSTRG.1072	Pavir.1KG177300	up	K00430/E1.11.1.7; peroxidase [EC:1.11.1.7]	ko00940		ko00310	Lysine degradation	74	1	0.041	0.068
MSTRG.5198	Pavir.1NG141000	up	K00430/E1.11.1.7; peroxidase [EC:1.11.1.7]	ko00940		ko00330	Arginine and proline metabolism	92	1	0.052	0.068
MSTRG.12486	-	up	K00430/E1.11.1.7; peroxidase [EC:1.11.1.7]	ko00940		ko00360	Phenylalanine metabolism	79	1	0.044	0.063
MSTRG.17060	Pavir.2NG648600	up	K00430/E1.11.1.7; peroxidase [EC:1.11.1.7]	ko00940		ko00380	Tryptophan metabolism	63	1	0.035	0.048
MSTRG.18365	Pavir.3KG131500	up	K00430/E1.11.1.7; peroxidase [EC:1.11.1.7]	ko00940		ko00430	Taurine and hypotaurine metabolism	27	1	0.015	0.03
MSTRG.22959	Pavir.3NG181400	up	K00430/E1.11.1.7; peroxidase [EC:1.11.1.7]	ko00940		ko00521	Streptomycin biosynthesis	16	1	0.009	0.037
MSTRG.25663	Pavir.4KG240800	up	K00430/E1.11.1.7; peroxidase [EC:1.11.1.7]	ko00940		ko00531	Glycosaminoglycan degradation	30	1	0.017	0.068
MSTRG.26834	Pavir.4KG383500	up	K00430/E1.11.1.7; peroxidase [EC:1.11.1.7]	ko00940		ko00562	Inositol phosphate metabolism	96	1	0.054	0.067
MSTRG.31353	Pavir.5KG262400	up	K00430/E1.11.1.7; peroxidase [EC:1.11.1.7]	ko00940		ko00590	Arachidonic acid metabolism	26	1	0.015	0.027
MSTRG.74285	Pavir.J748400	up	K00430/E1.11.1.7; peroxidase [EC:1.11.1.7]	ko00940		ko00600	Sphingolipid metabolism	61	1	0.034	0.056
MSTRG.51940	Pavir.7NG427600	up	K13065/E2.3.1.133; shikimate O-hydroxycinnamoyltransferase [EC:2.3.1.133]	ko00940, ko00941, ko00945		ko00603	Glycosphingolipid biosynthesis - globo and isoglobo series	21	1	0.012	0.048
MSTRG.8519	Pavir.2KG032100	up	K00660/CHS; chalcone synthase [EC:2.3.1.74]	ko00941, ko04712		ko00627	Aminobenzoate degradation	10	1	0.006	0.023
MSTRG.71425	Pavir.J396500	up	K00660/CHS; chalcone synthase [EC:2.3.1.74]	ko00941, ko04712		ko00630	Glyoxylate and dicarboxylate metabolism	113	1	0.063	0.077
MSTRG.8517	Pavir.2KG030200	up	K08081/TR1; tropinone reductase I [EC:1.1.1.206]	ko00960		ko00643	Styrene degradation	17	1	0.01	0.039
MSTRG.8518	Pavir.2KG030700	up	K08081/TR1; tropinone reductase I [EC:1.1.1.206]	ko00960		ko00770	Pantothenate and CoA biosynthesis	45	1	0.025	0.04
MSTRG.60357	Pavir.9KG489600	up	K03283/HSPA1s; heat shock 70kDa protein 1/2/6/8	ko03040, ko04010, ko04141		ko00910	Nitrogen metabolism	56	1	0.031	0.044
MSTRG.14730	Pavir.2NG312700	up	K02183/CALM; calmodulin	ko04014, ko04015, ko04016, ko04020, ko04022, ko04024, ko04070, ko04114, ko04218, ko04371, ko04626		ko00945	Stilbenoid, diarylheptanoid and gingerol biosynthesis	33	1	0.018	0.062
MSTRG.54001	Pavir.8KG313000	up	K02183/CALM; calmodulin	ko04014, ko04015, ko04016, ko04020, ko04022, ko04024, ko04070, ko04114, ko04218, ko04371, ko04626		ko03015	mRNA surveillance pathway	215	1	0.12	0.138
MSTRG.56250	Pavir.8NG276800	up	K02183/CALM; calmodulin	ko04014, ko04015, ko04016, ko04020, ko04022, ko04024, ko04070, ko04114, ko04218, ko04371, ko04626		ko03030	DNA replication	122	1	0.068	0.091
MSTRG.61817	Pavir.9NG018300	up	K14516/ERF1; ethylene-responsive transcription factor 1	ko04016, ko04075		ko03040	Spliceosome	384	1	0.215	0.227
MSTRG.16830	Pavir.2NG586800	up	K13464/JAZ; jasmonate ZIM domain-containing protein	ko04075		ko03410	Base excision repair	69	1	0.039	0.054
MSTRG.58502	Pavir.9KG267400	up	K13464/JAZ; jasmonate ZIM domain-containing protein	ko04075		ko03420	Nucleotide excision repair	133	1	0.075	0.093
MSTRG.23917	Pavir.3NG328700	up	K14488/SAUR; SAUR family protein	ko04075		ko03430	Mismatch repair	96	1	0.054	0.077
MSTRG.26615	Pavir.4KG369800	up	K14488/SAUR; SAUR family protein	ko04075		ko03440	Homologous recombination	135	1	0.076	0.099
MSTRG.9518	Pavir.2KG175300	up	K14489/AHK2_3_4; arabidopsis histidine kinase 2/3/4 (cytokinin receptor) [EC:2.7.13.3]	ko04075		ko04010	MAPK signaling pathway	177	1	0.099	0.404
MSTRG.21760	Pavir.3NG010100	up	K14492/ARR-A; two-component response regulator ARR-A family	ko04075		ko04141	Protein processing in endoplasmic reticulum	396	1	0.222	0.23
MSTRG.63047	Pavir.9NG170200	up	K14508/NPR1; regulatory protein NPR1	ko04075		ko04217	Necroptosis	117	1	0.066	0.267
MSTRG.57952	-	up	K12192/CHMP2B; charged multivesicular body protein 2B	ko04217		ko04810	Regulation of actin cytoskeleton	144	1	0.081	0.329
MSTRG.49209	-	up	K04508/TBL1; transducin (beta)-like 1	ko04310
MSTRG.34607	Pavir.5KG693300	up	K19882/NOTUM; O-palmitoleoyl-L-serine hydrolase [EC:3.1.1.98]	ko04310
MSTRG.21748	Pavir.3NG008800	up	K13448/CML; calcium-binding protein CML	ko04626
MSTRG.54746	Pavir.8NG026900	up	K13448/CML; calcium-binding protein CML	ko04626
MSTRG.53736	Pavir.8KG270100	up	K13457/RPM1; disease resistance protein RPM1	ko04626
MSTRG.55295	-	up	K13457/RPM1; disease resistance protein RPM1	ko04626
MSTRG.55296	-	up	K13457/RPM1; disease resistance protein RPM1	ko04626
MSTRG.42990	Pavir.6KG413000	down	K04565/SOD1; superoxide dismutase, Cu-Zn family [EC:1.15.1.1]
MSTRG.45143	Pavir.6NG300000	down	K17943/PUM; pumilio RNA-binding family
MSTRG.11483	Pavir.2KG448300	up	K08900/BCS1; mitochondrial chaperone BCS1
MSTRG.15181	Pavir.2NG369000	up	K09419/HSFF; heat shock transcription factor, other eukaryote
MSTRG.17622	Pavir.3KG034600	up	K17338/REEP1_2_3_4; receptor expression-enhancing protein 1/2/3/4
MSTRG.23894	Pavir.3NG262100	up	K22390/ACP7; acid phosphatase type 7
MSTRG.2418	Pavir.1KG333000	up	K05016/CLCN7; chloride channel 7
MSTRG.24963	-	up	K09874/NIP; aquaporin NIP
MSTRG.25901	Pavir.4KG277000	up	K14709/SLC39A1_2_3; solute carrier family 39 (zinc transporter), member 1/2/3
MSTRG.26547	Pavir.4KG360500	up	K19045/BB; E3 ubiquitin-protein ligase BIG BROTHER and related proteins [EC:2.3.2.27]
MSTRG.29304	Pavir.4NG335800	up	K07195/EXOC7; exocyst complex component 7
MSTRG.29362	Pavir.4NG342000	up	K07195/EXOC7; exocyst complex component 7
MSTRG.39421	Pavir.5NG562700	up	K08900/BCS1; mitochondrial chaperone BCS1
MSTRG.39629	Pavir.5NG589300	up	K17471/SULTR3; sulfate transporter 3
MSTRG.40449	Pavir.6KG049900	up	K08770/UBC; ubiquitin C
MSTRG.41824	Pavir.6KG256400	up	K09422/MYBP; transcription factor MYB, plant
MSTRG.4698	-	up	K01537/E3.6.3.8; Ca2+-transporting ATPase [EC:3.6.3.8]
MSTRG.49836	-	up	K03549/kup; KUP system potassium uptake protein
MSTRG.50745	-	up	K03320/amt; ammonium transporter, Amt family
MSTRG.50941	Pavir.7NG342400	up	K01369/LGMN; legumain [EC:3.4.22.34]
MSTRG.53114	-	up	K11968/ARIH1; ariadne-1 [EC:2.3.2.31]
MSTRG.56036	Pavir.8NG119800	up	K07766/E3.6.1.52; diphosphoinositol-polyphosphate diphosphatase [EC:3.6.1.52]
MSTRG.56880	Pavir.9KG002000	up	K14709/SLC39A1_2_3; solute carrier family 39 (zinc transporter), member 1/2/3
MSTRG.57825	-	up	K06950/uncharacterized protein
MSTRG.63462	Pavir.9NG227400	up	K03549/kup; KUP system potassium uptake protein
MSTRG.6353	Pavir.1NG301000	up	K08472/MLO; mlo protein
MSTRG.63955	Pavir.9NG296000	up	K07192/FLOT; flotillin
MSTRG.64587	Pavir.9NG388500	up	K01537/E3.6.3.8; Ca2+-transporting ATPase [EC:3.6.3.8]
MSTRG.64943	Pavir.9NG441600	up	K14709/SLC39A1_2_3; solute carrier family 39 (zinc transporter), member 1/2/3
MSTRG.6837	Pavir.1NG366500	up	K17782/MIA40; mitochondrial intermembrane space import and assembly protein 40
MSTRG.69844	Pavir.J235800	up	K07766/E3.6.1.52; diphosphoinositol-polyphosphate diphosphatase [EC:3.6.1.52]
MSTRG.70403	Pavir.J294000	up	K05387/GRIP; glutamate receptor, ionotropic, plant
MSTRG.72375	Pavir.J512900	up	K08900/BCS1; mitochondrial chaperone BCS1
MSTRG.8958	Pavir.2KG093900	up	K08867/WNK; WNK lysine deficient protein kinase [EC:2.7.11.1]

## Sheet: Sheet2
KO	Count	Term	Background number															#Term	Input number	Background number	P-Value	Corrected P-Value
ko00940	12	Phenylpropanoid biosynthesis	368	0.0326087		14	157	3.64883e-07	4.02121e-06		3.64883e-07	4.02121e-06	14	157	4.31188e-07	4.39534e-06	1	Phenylpropanoid biosynthesis	14	157	4.31188e-07	4.39534e-06
ko04075	9	Plant hormone signal transduction	441	0.0204082		8	271	0.0623605	0.192588		0.0623605	0.192588	9	271	0.02936	0.10519	1	Plant hormone signal transduction	9	271	0.02936	0.10519
ko04626	8	Plant-pathogen interaction	320	0.025		7	167	0.0168709	0.0622597		0.0168709	0.0622597	5	167	0.125181	0.314208	1	Plant-pathogen interaction	5	167	0.125181	0.314208
ko04016	6	MAPK signaling pathway - plant	175	0.0342857		#N/A		0.0231372	0.0853848		0.0231372	0.0853848	#N/A	#N/A		#N/A
ko00480	5	Glutathione metabolism	197	0.0253807		6	93	0.00393705	0.0170103		0.00393705	0.0170103	6	93	0.00421183	0.0177933	1	Glutathione metabolism	6	93	0.00421183	0.0177933
ko00520	5	Amino sugar and nucleotide sugar metabolism	258	0.0193798		6	135	0.0204265	0.0743581		0.0204265	0.0743581	5	135	0.0645524	0.202367	1	Amino sugar and nucleotide sugar metabolism	5	135	0.0645524	0.202367
ko00062	4	Fatty acid elongation	72	0.0555556		5	35	0.000326218	0.00182887		0.000326218	0.00182887	4	35	0.00291724	0.0129838	1	Flavonoid biosynthesis	8	21	9.15595e-09	1.12143e-07
ko00908	4	Zeatin biosynthesis	49	0.0816327		3	23	0.00686491	0.0279636		0.00686491	0.0279636	4	23	0.000719148	0.00377493	1	Circadian rhythm - plant	7	36	3.75871e-06	3.51406e-05
ko00980	4	Metabolism of xenobiotics by cytochrome P450	121	0.0330579		#N/A	#N/A	0.0169521	0.069053		0.0169521	0.069053	#N/A	#N/A	#N/A	#N/A	0	Biosynthesis of secondary metabolites	36	1076	2.23942e-05	0.0001743
ko00982	4	Drug metabolism - cytochrome P450	131	0.0305344		#N/A	#N/A	0.0183531	0.0747599		0.0183531	0.0747599	#N/A	#N/A	#N/A	#N/A	1	Zeatin biosynthesis	4	23	0.000719148	0.00377493
ko00983	4	Drug metabolism - other enzymes	155	0.0258065		#N/A	#N/A	0.0217155	0.0884564		0.0217155	0.0884564	#N/A	#N/A	#N/A	#N/A	1	Fatty acid elongation	4	35	0.00291724	0.0129838
ko04070	4	Phosphatidylinositol signaling system	123	0.0325203		1	68	0.0172323	0.0701944	0.0215064	0.0172323	0.0215064	1	68	0.655562	0.818158	0	Metabolic pathways	41	1910	0.0248895	0.0908207
ko00052	3	Galactose metabolism	108	0.0277778		3	55	0.0201744	0.0821788	0.0647878	0.0201744	0.0647878	3	55	0.0593015	0.19044	1	Lysine biosynthesis	2	16	0.0304326	0.106615
ko00230	3	Purine metabolism	288	0.0104167		3	158	0.0537984	0.219144	0.0785596	0.0537984	0.0785596	3	158	0.448402	0.654783	1	Stilbenoid, diarylheptanoid and gingerol biosynthesis	3	46	0.0390978	0.131997
ko00561	3	Glycerolipid metabolism	129	0.0232558		2	53	0.0240972	0.098158	0.0482826	0.0240972	0.0482826	2	53	0.205873	0.412499	1	Galactose metabolism	3	55	0.0593015	0.19044
ko00941	3	Flavonoid biosynthesis	58	0.0517241		8	21	8.21505e-09	1.0924e-07		8.21505e-09	1.0924e-07	8	21	9.15595e-09	1.12143e-07	1	Cyanoamino acid metabolism	3	60	0.072256	0.222977
ko04014	3	Ras signaling pathway	126	0.0238095		#N/A	#N/A	0.0235368	0.0958753		0.0235368	0.0958753	#N/A	#N/A	#N/A	#N/A	1	Tropane, piperidine and pyridine alkaloid biosynthesis	2	36	0.114774	0.296409
ko04015	3	Rap1 signaling pathway	93	0.0322581		#N/A	#N/A	0.0173724	0.0707651		0.0173724	0.0707651	#N/A	#N/A	#N/A	#N/A	0	Glycosphingolipid biosynthesis - globo series	1	9	0.142989	0.334701
ko04020	3	Calcium signaling pathway	81	0.037037		#N/A	#N/A	0.0151308	0.0616341		0.0151308	0.0616341	#N/A	#N/A	#N/A	#N/A	0	Limonene and pinene degradation	2	44	0.156383	0.349485
ko04022	3	cGMP-PKG signaling pathway	123	0.0243902		#N/A	#N/A	0.0229764	0.0935925		0.0229764	0.0935925	#N/A	#N/A	#N/A	#N/A	1	Glycerolipid metabolism	2	53	0.205873	0.412499
ko04024	3	cAMP signaling pathway	137	0.0218978		#N/A	#N/A	0.0255916	0.104245		0.0255916	0.104245	#N/A	#N/A	#N/A	#N/A	1	Taurine and hypotaurine metabolism	1	14	0.20664	0.412499
ko04114	3	Oocyte meiosis	234	0.0128205		#N/A	#N/A	0.0437112	0.178054		0.0437112	0.178054	#N/A	#N/A	#N/A	#N/A	1	Arachidonic acid metabolism	1	17	0.242544	0.453514
ko04218	3	Cellular senescence	187	0.0160428		#N/A	#N/A	0.0349316	0.142291		0.0349316	0.142291	#N/A	#N/A	#N/A	#N/A	0	Sesquiterpenoid and triterpenoid biosynthesis	1	23	0.30956	0.530482
ko04371	3	Apelin signaling pathway	137	0.0218978		#N/A	#N/A	0.0255916	0.104245		0.0255916	0.104245	#N/A	#N/A	#N/A	#N/A	1	Sphingolipid metabolism	1	26	0.340815	0.559988
ko00010	2	Glycolysis / Gluconeogenesis	249	0.00803213		2	117	0.0697699	0.284202	0.0929566	0.0697699	0.0929566	2	117	0.546011	0.727468	1	Lysine degradation	1	26	0.340815	0.559988
ko00240	2	Pyrimidine metabolism	223	0.00896861		2	116	0.0624846	0.254526	0.0709747	0.0624846	0.0709747	1	116	0.836161	0.949773	1	Pantothenate and CoA biosynthesis	1	28	0.360864	0.578848
ko00460	2	Cyanoamino acid metabolism	78	0.025641		3	60	0.0699295	0.212295		0.0699295	0.212295	3	60	0.072256	0.222977	1	Starch and sucrose metabolism	4	202	0.387553	0.601506
ko00500	2	Starch and sucrose metabolism	231	0.00865801		4	202	0.0647262	0.263657	0.100459	0.0647262	0.100459	4	202	0.387553	0.601506	1	Purine metabolism	3	158	0.448402	0.654783
ko00564	2	Glycerophospholipid metabolism	197	0.0101523		1	86	0.0551994	0.22485	0.065674	0.0551994	0.065674	1	86	0.739285	0.87957	1	Mismatch repair	1	39	0.460739	0.661187
ko00960	2	Tropane, piperidine and pyridine alkaloid biosynthesis	41	0.0487805		2	36	0.0114882	0.0467963	0.0296689	0.0114882	0.0296689	2	36	0.114774	0.296409	1	Phenylalanine metabolism	1	42	0.485165	0.686882
ko04310	2	Wnt signaling pathway	126	0.015873		#N/A	#N/A	0.0353052	0.143813		0.0353052	0.143813	#N/A	#N/A	#N/A	#N/A	1	Nitrogen metabolism	1	42	0.485165	0.686882
ko04712	2	Circadian rhythm - plant	77	0.025974		7	36	3.42991e-06	3.22732e-05		3.42991e-06	3.22732e-05	7	36	3.75871e-06	3.51406e-05	1	Base excision repair	1	43	0.493059	0.693707
ko00030	1	Pentose phosphate pathway	108	0.00925926		1	58	0.0605232	0.246536	0.0786103	0.0605232	0.0786103	1	58	0.597961	0.776659	1	Tryptophan metabolism	1	46	0.516024	0.708356
ko00250	1	Alanine, aspartate and glutamate metabolism	80	0.0125		1	48	0.044832	0.18262	0.0607501	0.044832	0.0607501	1	48	0.530754	0.719204	1	Alanine, aspartate and glutamate metabolism	1	48	0.530754	0.719204
ko00260	1	Glycine, serine and threonine metabolism	116	0.00862069		1	72	0.0650064	0.264798	0.0798059	0.0650064	0.0798059	1	72	0.676227	0.830177	1	DNA replication	1	50	0.545037	0.72733
ko00270	1	Cysteine and methionine metabolism	176	0.00568182		1	112	0.0986305	0.401763	0.112718	0.0986305	0.112718	1	112	0.825687	0.943625	1	Glycolysis / Gluconeogenesis	2	117	0.546011	0.727468
ko00300	1	Lysine biosynthesis	30	0.0333333		2	16	0.016812	0.0684824	0.058898	0.016812	0.058898	2	16	0.0304326	0.106615	1	Arginine and proline metabolism	1	53	0.565653	0.747892
ko00310	1	Lysine degradation	74	0.0135135		1	26	0.0414696	0.168923	0.0681381	0.0414696	0.0681381	1	26	0.340815	0.559988	1	Homologous recombination	1	56	0.585336	0.766575
ko00330	1	Arginine and proline metabolism	92	0.0108696		1	53	0.0515568	0.210013	0.0681672	0.0515568	0.0681672	1	53	0.565653	0.747892	1	Pentose phosphate pathway	1	58	0.597961	0.776659
ko00360	1	Phenylalanine metabolism	79	0.0126582		1	42	0.0442716	0.180337	0.0626785	0.0442716	0.0626785	1	42	0.485165	0.686882	0	Endocytosis	2	142	0.649558	0.815172
ko00380	1	Tryptophan metabolism	63	0.015873		1	46	0.0353052	0.143813	0.0484642	0.0353052	0.0484642	1	46	0.516024	0.708356	1	Phosphatidylinositol signaling system	1	68	0.655562	0.818158
ko00430	1	Taurine and hypotaurine metabolism	27	0.037037		1	14	0.0151308	0.0616341	0.0302044	0.0151308	0.0302044	1	14	0.20664	0.412499	1	Inositol phosphate metabolism	1	68	0.655562	0.818158
ko00521	1	Streptomycin biosynthesis	16	0.0625		#N/A	#N/A	0.00896641	0.0365239		0.00896641	0.0365239	#N/A	#N/A	#N/A	#N/A	1	Nucleotide excision repair	1	69	0.660849	0.822806
ko00531	1	Glycosaminoglycan degradation	30	0.0333333		#N/A	#N/A	0.016812	0.0684824		0.016812	0.0684824	#N/A	#N/A	#N/A	#N/A	1	Glycine, serine and threonine metabolism	1	72	0.676227	0.830177
ko00562	1	Inositol phosphate metabolism	96	0.0104167		1	68	0.0537984	0.219144	0.0671418	0.0537984	0.0671418	1	68	0.655562	0.818158	1	Glyoxylate and dicarboxylate metabolism	1	74	0.68609	0.836437
ko00590	1	Arachidonic acid metabolism	26	0.0384615		1	17	0.0145704	0.0593514	0.0272441	0.0145704	0.0272441	1	17	0.242544	0.453514	1	Glycerophospholipid metabolism	1	86	0.739285	0.87957
ko00600	1	Sphingolipid metabolism	61	0.0163934		1	26	0.0341844	0.139247	0.0561679	0.0341844	0.0561679	1	26	0.340815	0.559988	0	Phagosome	1	86	0.739285	0.87957
ko00603	1	Glycosphingolipid biosynthesis - globo and isoglobo series	21	0.047619		#N/A	#N/A	0.0117684	0.0479376		0.0117684	0.0479376	#N/A	#N/A	#N/A	#N/A	0	Peroxisome	1	87	0.743289	0.883004
ko00627	1	Aminobenzoate degradation	10	0.1		#N/A	#N/A	0.005604	0.0228275		0.005604	0.0228275	#N/A	#N/A	#N/A	#N/A	0	Biosynthesis of amino acids	3	255	0.758072	0.895255
ko00630	1	Glyoxylate and dicarboxylate metabolism	113	0.00884956		1	74	0.0633252	0.25795	0.0772021	0.0633252	0.0772021	1	74	0.68609	0.836437	1	Cysteine and methionine metabolism	1	112	0.825687	0.943625
ko00643	1	Styrene degradation	17	0.0588235		#N/A	#N/A	0.00952681	0.0388067		0.00952681	0.0388067	#N/A	#N/A	#N/A	#N/A	1	mRNA surveillance pathway	1	114	0.831005	0.94869
ko00770	1	Pantothenate and CoA biosynthesis	45	0.0222222		1	28	0.025218	0.102724	0.0404512	0.025218	0.0404512	1	28	0.360864	0.578848	1	Pyrimidine metabolism	1	116	0.836161	0.949773
ko00910	1	Nitrogen metabolism	56	0.0178571		1	42	0.0313824	0.127834	0.0444303	0.0313824	0.0444303	1	42	0.485165	0.686882	1	Spliceosome	1	192	0.949611	1
ko00945	1	Stilbenoid, diarylheptanoid and gingerol biosynthesis	33	0.030303		3	46	0.0184932	0.0753306	0.0624344	0.0184932	0.0624344	3	46	0.0390978	0.131997	1	Protein processing in endoplasmic reticulum	1	212	0.963073	1
ko03015	1	mRNA surveillance pathway	215	0.00465116		1	114	0.120486	0.49079	0.137549	0.120486	0.137549	1	114	0.831005	0.94869	0	Carbon metabolism	1	262	0.98304	1
ko03030	1	DNA replication	122	0.00819672		1	50	0.0683689	0.278495	0.0912355	0.0683689	0.0912355	1	50	0.545037	0.72733
ko03040	1	Spliceosome	384	0.00260417		1	192	0.215194	0.876574	0.226613	0.215194	0.226613	1	192	0.949611	1
ko03410	1	Base excision repair	69	0.0144928		1	43	0.0386676	0.157509	0.0544033	0.0386676	0.0544033	1	43	0.493059	0.693707
ko03420	1	Nucleotide excision repair	133	0.0075188		1	69	0.0745333	0.303605	0.0927995	0.0745333	0.0927995	1	69	0.660849	0.822806
ko03430	1	Mismatch repair	96	0.0104167		1	39	0.0537984	0.219144	0.0772039	0.0537984	0.0772039	1	39	0.460739	0.661187
ko03440	1	Homologous recombination	135	0.00740741		1	56	0.0756541	0.308171	0.099079	0.0756541	0.099079	1	56	0.585336	0.766575
ko04010	1	MAPK signaling pathway	177	0.00564972		#N/A	#N/A	0.0991909	0.404046		0.0991909	0.404046	#N/A	#N/A	#N/A	#N/A
ko04141	1	Protein processing in endoplasmic reticulum	396	0.00252525		1	212	0.221919	0.903967	0.230428	0.221919	0.230428	1	212	0.963073	1
ko04217	1	Necroptosis	117	0.00854701		#N/A	#N/A	0.0655668	0.267081		0.0655668	0.267081	#N/A	#N/A	#N/A	#N/A
ko04810	1	Regulation of actin cytoskeleton	144	0.00694444		#N/A	#N/A	0.0806977	0.328715		0.0806977	0.328715	#N/A	#N/A	#N/A	#N/A

## Sheet: Sheet6
Pathway ID	Pathway	Count	p-value	Corrected p-value
ko00940	Phenylpropanoid biosynthesis	12	3.64883e-07	4.02e-06
ko04075	Plant hormone signal transduction	9	0.062	0.193
ko04626	Plant-pathogen interaction	8	0.017	0.062
ko04016	MAPK signaling pathway - plant	6	0.023	0.085
ko00480	Glutathione metabolism	5	0.004	0.017
ko00520	Amino sugar and nucleotide sugar metabolism	5	0.02	0.074
ko00062	Fatty acid elongation	4	0.000326	0.002
ko00908	Zeatin biosynthesis	4	0.007	0.028
ko00980	Metabolism of xenobiotics by cytochrome P450	4	0.017	0.069
ko00982	Drug metabolism - cytochrome P450	4	0.018	0.075
ko00983	Drug metabolism - other enzymes	4	0.022	0.088
ko04070	Phosphatidylinositol signaling system	4	0.017	0.022
ko00052	Galactose metabolism	3	0.02	0.065
ko00230	Purine metabolism	3	0.054	0.079
ko00561	Glycerolipid metabolism	3	0.024	0.048
ko00941	Flavonoid biosynthesis	3	8.21505e-09	0
ko04014	Ras signaling pathway	3	0.024	0.096
ko04015	Rap1 signaling pathway	3	0.017	0.071
ko04020	Calcium signaling pathway	3	0.015	0.062
ko04022	cGMP-PKG signaling pathway	3	0.023	0.094
ko04024	cAMP signaling pathway	3	0.026	0.104
ko04114	Oocyte meiosis	3	0.044	0.178
ko04218	Cellular senescence	3	0.035	0.142
ko04371	Apelin signaling pathway	3	0.026	0.104
ko00010	Glycolysis / Gluconeogenesis	2	0.07	0.093
ko00240	Pyrimidine metabolism	2	0.062	0.071
ko00460	Cyanoamino acid metabolism	2	0.07	0.212
ko00500	Starch and sucrose metabolism	2	0.065	0.1
ko00564	Glycerophospholipid metabolism	2	0.055	0.066
ko00960	Tropane, piperidine and pyridine alkaloid biosynthesis	2	0.011	0.03
ko04310	Wnt signaling pathway	2	0.035	0.144
ko04712	Circadian rhythm - plant	2	3.42991e-06	0
ko00030	Pentose phosphate pathway	1	0.061	0.079
ko00250	Alanine, aspartate and glutamate metabolism	1	0.045	0.061
ko00260	Glycine, serine and threonine metabolism	1	0.065	0.08
ko00270	Cysteine and methionine metabolism	1	0.099	0.113
ko00300	Lysine biosynthesis	1	0.017	0.059
ko00310	Lysine degradation	1	0.041	0.068
ko00330	Arginine and proline metabolism	1	0.052	0.068
ko00360	Phenylalanine metabolism	1	0.044	0.063
ko00380	Tryptophan metabolism	1	0.035	0.048
ko00430	Taurine and hypotaurine metabolism	1	0.015	0.03
ko00521	Streptomycin biosynthesis	1	0.009	0.037
ko00531	Glycosaminoglycan degradation	1	0.017	0.068
ko00562	Inositol phosphate metabolism	1	0.054	0.067
ko00590	Arachidonic acid metabolism	1	0.015	0.027
ko00600	Sphingolipid metabolism	1	0.034	0.056
ko00603	Glycosphingolipid biosynthesis - globo and isoglobo series	1	0.012	0.048
ko00627	Aminobenzoate degradation	1	0.006	0.023
ko00630	Glyoxylate and dicarboxylate metabolism	1	0.063	0.077
ko00643	Styrene degradation	1	0.01	0.039
ko00770	Pantothenate and CoA biosynthesis	1	0.025	0.04
ko00910	Nitrogen metabolism	1	0.031	0.044
ko00945	Stilbenoid, diarylheptanoid and gingerol biosynthesis	1	0.018	0.062
ko03015	mRNA surveillance pathway	1	0.12	0.138
ko03030	DNA replication	1	0.068	0.091
ko03040	Spliceosome	1	0.215	0.227
ko03410	Base excision repair	1	0.039	0.054
ko03420	Nucleotide excision repair	1	0.075	0.093
ko03430	Mismatch repair	1	0.054	0.077
ko03440	Homologous recombination	1	0.076	0.099
ko04010	MAPK signaling pathway	1	0.099	0.404
ko04141	Protein processing in endoplasmic reticulum	1	0.222	0.23
ko04217	Necroptosis	1	0.066	0.267
ko04810	Regulation of actin cytoskeleton	1	0.081	0.329

## Sheet: Sheet5
#Term	Database	ID	Input number	Background number	P-Value	Corrected P-Value	Input	Hyperlink
Flavonoid biosynthesis	KEGG PATHWAY	ath00941	8	21	8.21505e-09	1.0924e-07	Chr02K_Pavir.2KG031700.1.v4.1|Chr02K_Pavir.2KG032100.1.v4.1|Chr02K_MSTRG.8519.9|Chr02K_Pavir.2KG031400.1.v4.1|Chr02K_MSTRG.8519.4|Chr02K_MSTRG.8519.10|scaffold_2954_Pavir.J396500.1.v4.1|Chr07N_Pavir.7NG427600.1.v4.1	http://www.genome.jp/kegg-bin/show_pathway?ath00941/ath:AT5G48930%09red/ath:AT5G13930%09red
Phenylpropanoid biosynthesis	KEGG PATHWAY	ath00940	14	157	3.64883e-07	4.02121e-06	Chr02K_MSTRG.12486.1|Chr04K_Pavir.4KG383500.1.v4.1|Chr01N_Pavir.1NG141000.1.v4.1|Chr03K_Pavir.3KG131500.1.v4.1|Chr03N_Pavir.3NG181400.1.v4.1|Chr02N_Pavir.2NG648600.1.v4.1|scaffold_8725_Pavir.J748400.1.v4.1|Chr02N_Pavir.2NG374900.1.v4.1|Chr02N_Pavir.2NG375000.1.v4.1|Chr04K_Pavir.4KG240800.1.v4.1|Chr05K_Pavir.5KG262400.1.v4.1|Chr07K_Pavir.7KG284900.1.v4.1|Chr07N_Pavir.7NG427600.1.v4.1|Chr01K_Pavir.…	http://www.genome.jp/kegg-bin/show_pathway?ath00940/ath:AT5G48930%09red/ath:AT5G06720%09red/ath:AT5G24550%09red/ath:AT2G44480%09red/ath:AT5G42180%09red/ath:AT2G41480%09red/ath:AT5G05340%09red/ath:AT4G30170%09red/ath:AT3G50740%09red
Circadian rhythm - plant	KEGG PATHWAY	ath04712	7	36	3.42991e-06	3.22732e-05	Chr02K_Pavir.2KG031700.1.v4.1|Chr02K_Pavir.2KG032100.1.v4.1|Chr02K_MSTRG.8519.9|Chr02K_Pavir.2KG031400.1.v4.1|Chr02K_MSTRG.8519.4|Chr02K_MSTRG.8519.10|scaffold_2954_Pavir.J396500.1.v4.1	http://www.genome.jp/kegg-bin/show_pathway?ath04712/ath:AT5G13930%09red
Biosynthesis of secondary metabolites	KEGG PATHWAY	ath01110	37	1076	7.0494e-06	6.23213e-05	Chr07N_Pavir.7NG301900.1.v4.1|Chr09K_MSTRG.60977.2|Chr02K_MSTRG.8519.9|Chr03N_Pavir.3NG181400.1.v4.1|Chr02K_MSTRG.8519.4|Chr02K_Pavir.2KG032100.1.v4.1|Chr07N_Pavir.7NG427600.1.v4.1|Chr09N_Pavir.9NG570600.1.v4.1|Chr02K_MSTRG.8855.4|Chr01N_Pavir.1NG562500.1.v4.1|Chr02N_Pavir.2NG374900.1.v4.1|Chr09K_Pavir.9KG641000.1.v4.1|Chr04K_Pavir.4KG240800.1.v4.1|Chr01K_Pavir.1KG177300.1.v4.1|Chr07K_Pavir.7KG36…	http://www.genome.jp/kegg-bin/show_pathway?ath01110/ath:AT5G23960%09red/ath:AT5G06720%09red/ath:AT5G06060%09red/ath:AT4G33680%09red/ath:AT1G70730%09red/ath:AT3G26300%09red/ath:AT5G48930%09red/ath:AT2G26640%09red/ath:AT1G01120%09red/ath:AT5G42180%09red/ath:AT2G41480%09red/ath:AT5G25120%09red/ath:AT5G24550%09red/ath:AT5G53460%09red/ath:AT5G05340%09red/ath:AT5G15140%09red/ath:AT1G80380%09red/ath:AT2…
Fatty acid elongation	KEGG PATHWAY	ath00062	5	35	0.000326218	0.00182887	Chr01N_Pavir.1NG562500.1.v4.1|Chr09N_Pavir.9NG552000.1.v4.1|Chr09N_Pavir.9NG570600.1.v4.1|scaffold_15390_Pavir.J134100.1.v4.1|Chr09K_Pavir.9KG600900.1.v4.1	http://www.genome.jp/kegg-bin/show_pathway?ath00062/ath:AT1G01120%09red/ath:AT2G28630%09red/ath:AT2G26640%09red/ath:AT1G04220%09red
Glutathione metabolism	KEGG PATHWAY	ath00480	6	93	0.00393705	0.0170103	Chr02N_Pavir.2NG098000.1.v4.1|Chr03K_Pavir.3KG149600.1.v4.1|Chr09N_Pavir.9NG622800.1.v4.1|Chr04N_Pavir.4NG314600.1.v4.1|Chr09N_MSTRG.66835.2|Chr07N_Pavir.7NG180400.1.v4.1	http://www.genome.jp/kegg-bin/show_pathway?ath00480/ath:AT3G62760%09red/ath:AT4G39640%09red/ath:AT3G09270%09red
Zeatin biosynthesis	KEGG PATHWAY	ath00908	3	23	0.00686491	0.0279636	scaffold_4003_Pavir.J496300.1.v4.1|Chr05N_Pavir.5NG047700.1.v4.1|Chr05N_Pavir.5NG050900.1.v4.1	http://www.genome.jp/kegg-bin/show_pathway?ath00908/ath:AT1G75450%09red/ath:AT4G29740%09red
Metabolic pathways	KEGG PATHWAY	ath01100	43	1910	0.00849532	0.0338341	Chr07N_Pavir.7NG301900.1.v4.1|Chr09K_MSTRG.60977.2|Chr02K_MSTRG.8519.9|Chr03K_Pavir.3KG131500.1.v4.1|Chr02K_MSTRG.8519.4|Chr07N_MSTRG.50601.1|Chr09K_Pavir.9KG575500.1.v4.1|Chr08K_Pavir.8KG291700.1.v4.1|Chr02K_Pavir.2KG032100.1.v4.1|Chr07N_Pavir.7NG427600.1.v4.1|Chr02K_MSTRG.8855.4|Chr07N_MSTRG.50673.1|Chr02N_Pavir.2NG374900.1.v4.1|Chr09K_Pavir.9KG641000.1.v4.1|Chr04K_Pavir.4KG240800.1.v4.1|Chr01K…	http://www.genome.jp/kegg-bin/show_pathway?ath01100/ath:AT5G48930%09red/ath:AT5G06720%09red/ath:AT5G24550%09red/ath:AT4G33680%09red/ath:AT1G70730%09red/ath:AT5G23960%09red/ath:AT5G42180%09red/ath:AT3G23920%09red/ath:AT1G80050%09red/ath:AT2G41480%09red/ath:AT5G25120%09red/ath:AT5G06060%09red/ath:AT3G07800%09red/ath:AT5G53460%09red/ath:AT4G32180%09red/ath:AT3G54420%09red/ath:AT5G15140%09red/ath:AT1…
Plant-pathogen interaction	KEGG PATHWAY	ath04626	7	167	0.0168709	0.0622597	Chr02N_Pavir.2NG312700.1.v4.1|Chr09N_Pavir.9NG570600.1.v4.1|Chr03N_Pavir.3NG008800.1.v4.1|Chr09N_Pavir.9NG581700.1.v4.1|Chr08N_MSTRG.55295.5|Chr08N_Pavir.8NG026900.1.v4.1|Chr09N_Pavir.9NG279400.1.v4.1	http://www.genome.jp/kegg-bin/show_pathway?ath04626/ath:AT3G07040%09red/ath:AT3G10190%09red/ath:AT3G47480%09red/ath:AT5G44460%09red/ath:AT1G01120%09red
Amino sugar and nucleotide sugar metabolism	KEGG PATHWAY	ath00520	6	135	0.0204265	0.0743581	Chr05K_Pavir.5KG500300.1.v4.1|Chr02K_MSTRG.8855.4|Chr07N_MSTRG.50601.1|Chr05K_Pavir.5KG447000.1.v4.1|Chr08K_Pavir.8KG291700.1.v4.1|Chr05N_Pavir.5NG458800.1.v4.1	http://www.genome.jp/kegg-bin/show_pathway?ath00520/ath:AT1G70730%09red/ath:AT3G54420%09red/ath:AT5G24090%09red
Lysine biosynthesis	KEGG PATHWAY	ath00300	2	16	0.0296615	0.102856	Chr09K_MSTRG.60977.2|Chr09K_Pavir.9KG641000.1.v4.1	http://www.genome.jp/kegg-bin/show_pathway?ath00300/ath:AT4G33680%09red
Stilbenoid, diarylheptanoid and gingerol biosynthesis	KEGG PATHWAY	ath00945	3	46	0.0377614	0.125274	Chr02N_Pavir.2NG070000.1.v4.1|Chr07N_Pavir.7NG427600.1.v4.1|Chr09K_Pavir.9KG014900.1.v4.1	http://www.genome.jp/kegg-bin/show_pathway?ath00945/ath:AT5G25120%09red/ath:AT3G26300%09red/ath:AT5G48930%09red
Galactose metabolism	KEGG PATHWAY	ath00052	3	55	0.0573505	0.181291	Chr07K_Pavir.7KG369900.1.v4.1|Chr09K_Pavir.9KG150800.1.v4.1|Chr02K_MSTRG.8855.4	http://www.genome.jp/kegg-bin/show_pathway?ath00052/ath:AT5G15140%09red/ath:AT1G70730%09red/ath:AT5G08370%09red
Plant hormone signal transduction	KEGG PATHWAY	ath04075	8	271	0.0623605	0.192588	Chr03N_Pavir.3NG010100.1.v4.1|Chr09K_Pavir.9KG401100.1.v4.1|Chr02K_Pavir.2KG175300.1.v4.1|Chr09K_Pavir.9KG267400.1.v4.1|Chr02N_Pavir.2NG586800.1.v4.1|Chr03N_Pavir.3NG328700.1.v4.1|Chr09N_Pavir.9NG170200.1.v4.1|Chr04K_Pavir.4KG369800.1.v4.1	http://www.genome.jp/kegg-bin/show_pathway?ath04075/ath:AT1G78290%09red/ath:AT1G56150%09red/ath:AT1G27320%09red/ath:AT1G74950%09red/ath:AT5G45110%09red/ath:AT2G41310%09red
Cyanoamino acid metabolism	KEGG PATHWAY	ath00460	3	60	0.0699295	0.212295	Chr07N_Pavir.7NG180400.1.v4.1|Chr02N_Pavir.2NG374900.1.v4.1|Chr02N_Pavir.2NG375000.1.v4.1	http://www.genome.jp/kegg-bin/show_pathway?ath00460/ath:AT4G39640%09red/ath:AT5G24550%09red/ath:AT2G44480%09red
Tropane, piperidine and pyridine alkaloid biosynthesis	KEGG PATHWAY	ath00960	2	36	0.112164	0.289902	Chr02K_Pavir.2KG030200.1.v4.1|Chr02K_Pavir.2KG030700.1.v4.1	http://www.genome.jp/kegg-bin/show_pathway?ath00960/ath:AT5G06060%09red
Glycosphingolipid biosynthesis - globo series	KEGG PATHWAY	ath00603	1	9	0.141143	0.324428	Chr09K_Pavir.9KG150800.1.v4.1	http://www.genome.jp/kegg-bin/show_pathway?ath00603/ath:AT5G08370%09red
Limonene and pinene degradation	KEGG PATHWAY	ath00903	2	44	0.152983	0.338296	Chr09K_Pavir.9KG014900.1.v4.1|Chr02N_Pavir.2NG070000.1.v4.1	http://www.genome.jp/kegg-bin/show_pathway?ath00903/ath:AT5G25120%09red/ath:AT3G26300%09red
Glycerolipid metabolism	KEGG PATHWAY	ath00561	2	53	0.201622	0.399476	Chr09K_Pavir.9KG150800.1.v4.1|Chr05N_MSTRG.38499.2	http://www.genome.jp/kegg-bin/show_pathway?ath00561/ath:AT1G80380%09red/ath:AT5G08370%09red
Taurine and hypotaurine metabolism	KEGG PATHWAY	ath00430	1	14	0.204075	0.399476	Chr07N_Pavir.7NG180400.1.v4.1	http://www.genome.jp/kegg-bin/show_pathway?ath00430/ath:AT4G39640%09red
Arachidonic acid metabolism	KEGG PATHWAY	ath00590	1	17	0.239604	0.44262	Chr07N_Pavir.7NG180400.1.v4.1	http://www.genome.jp/kegg-bin/show_pathway?ath00590/ath:AT4G39640%09red
Sesquiterpenoid and triterpenoid biosynthesis	KEGG PATHWAY	ath00909	1	23	0.305984	0.514988	Chr09N_Pavir.9NG595500.1.v4.1	http://www.genome.jp/kegg-bin/show_pathway?ath00909/ath:AT5G23960%09red
Sphingolipid metabolism	KEGG PATHWAY	ath00600	1	26	0.336973	0.54219	Chr09K_Pavir.9KG150800.1.v4.1	http://www.genome.jp/kegg-bin/show_pathway?ath00600/ath:AT5G08370%09red
Lysine degradation	KEGG PATHWAY	ath00310	1	26	0.336973	0.54219	Chr02K_MSTRG.10361.3	http://www.genome.jp/kegg-bin/show_pathway?ath00310/ath:AT2G35160%09red
Pantothenate and CoA biosynthesis	KEGG PATHWAY	ath00770	1	28	0.356862	0.564038	Chr04K_MSTRG.24834.2	http://www.genome.jp/kegg-bin/show_pathway?ath00770/ath:AT4G32180%09red
Starch and sucrose metabolism	KEGG PATHWAY	ath00500	4	202	0.377688	0.577662	Chr09K_Pavir.9KG575500.1.v4.1|Chr02N_Pavir.2NG374900.1.v4.1|Chr02N_Pavir.2NG375000.1.v4.1|Chr02K_MSTRG.8855.4	http://www.genome.jp/kegg-bin/show_pathway?ath00500/ath:AT3G23920%09red/ath:AT1G70730%09red/ath:AT5G24550%09red/ath:AT2G44480%09red
Purine metabolism	KEGG PATHWAY	ath00230	3	158	0.439465	0.634739	Chr05K_Pavir.5KG036300.1.v4.1|Chr07N_MSTRG.50673.1|Chr02K_MSTRG.8855.4	http://www.genome.jp/kegg-bin/show_pathway?ath00230/ath:AT1G78650%09red/ath:AT1G70730%09red/ath:AT1G80050%09red
Mismatch repair	KEGG PATHWAY	ath03430	1	39	0.456075	0.647111	Chr05K_Pavir.5KG036300.1.v4.1	http://www.genome.jp/kegg-bin/show_pathway?ath03430/ath:AT1G78650%09red
Phenylalanine metabolism	KEGG PATHWAY	ath00360	1	42	0.480376	0.675634	Chr02N_Pavir.2NG493200.1.v4.1	http://www.genome.jp/kegg-bin/show_pathway?ath00360/ath:AT4G34880%09red
Nitrogen metabolism	KEGG PATHWAY	ath00910	1	42	0.480376	0.675634	Chr05N_MSTRG.38328.2	http://www.genome.jp/kegg-bin/show_pathway?ath00910/ath:AT5G53460%09red
Base excision repair	KEGG PATHWAY	ath03410	1	43	0.488233	0.683102	Chr05K_Pavir.5KG036300.1.v4.1	http://www.genome.jp/kegg-bin/show_pathway?ath03410/ath:AT1G78650%09red
Tryptophan metabolism	KEGG PATHWAY	ath00380	1	46	0.511101	0.6981	Chr02N_Pavir.2NG493200.1.v4.1	http://www.genome.jp/kegg-bin/show_pathway?ath00380/ath:AT4G34880%09red
Alanine, aspartate and glutamate metabolism	KEGG PATHWAY	ath00250	1	48	0.525777	0.709115	Chr05N_MSTRG.38328.2	http://www.genome.jp/kegg-bin/show_pathway?ath00250/ath:AT5G53460%09red
Pyrimidine metabolism	KEGG PATHWAY	ath00240	2	116	0.533921	0.714113	Chr05K_Pavir.5KG036300.1.v4.1|Chr09N_MSTRG.65385.3	http://www.genome.jp/kegg-bin/show_pathway?ath00240/ath:AT1G78650%09red/ath:AT3G07800%09red
Glycolysis / Gluconeogenesis	KEGG PATHWAY	ath00010	2	117	0.538467	0.718678	Chr07K_Pavir.7KG369900.1.v4.1|Chr02K_MSTRG.8855.4	http://www.genome.jp/kegg-bin/show_pathway?ath00010/ath:AT5G15140%09red/ath:AT1G70730%09red
DNA replication	KEGG PATHWAY	ath03030	1	50	0.540013	0.718678	Chr05K_Pavir.5KG036300.1.v4.1	http://www.genome.jp/kegg-bin/show_pathway?ath03030/ath:AT1G78650%09red
Arginine and proline metabolism	KEGG PATHWAY	ath00330	1	53	0.560572	0.739331	Chr02N_Pavir.2NG493200.1.v4.1	http://www.genome.jp/kegg-bin/show_pathway?ath00330/ath:AT4G34880%09red
Homologous recombination	KEGG PATHWAY	ath03440	1	56	0.580214	0.753483	Chr05K_Pavir.5KG036300.1.v4.1	http://www.genome.jp/kegg-bin/show_pathway?ath03440/ath:AT1G78650%09red
Pentose phosphate pathway	KEGG PATHWAY	ath00030	1	58	0.59282	0.763302	Chr02K_MSTRG.8855.4	http://www.genome.jp/kegg-bin/show_pathway?ath00030/ath:AT1G70730%09red
Endocytosis	KEGG PATHWAY	ath04144	2	142	0.642019	0.800781	Chr09K_Pavir.9KG489600.1.v4.1|Chr09K_MSTRG.57952.2	http://www.genome.jp/kegg-bin/show_pathway?ath04144/ath:AT5G02500%09red/ath:AT1G03950%09red
Phosphatidylinositol signaling system	KEGG PATHWAY	ath04070	1	68	0.650405	0.80562	Chr04K_MSTRG.25576.5	http://www.genome.jp/kegg-bin/show_pathway?ath04070/ath:AT3G14270%09red
Inositol phosphate metabolism	KEGG PATHWAY	ath00562	1	68	0.650405	0.80562	Chr04K_MSTRG.25576.5	http://www.genome.jp/kegg-bin/show_pathway?ath00562/ath:AT3G14270%09red
Nucleotide excision repair	KEGG PATHWAY	ath03420	1	69	0.655696	0.810926	Chr05K_Pavir.5KG036300.1.v4.1	http://www.genome.jp/kegg-bin/show_pathway?ath03420/ath:AT1G78650%09red
Glycine, serine and threonine metabolism	KEGG PATHWAY	ath00260	1	72	0.671095	0.819701	Chr05N_MSTRG.38499.2	http://www.genome.jp/kegg-bin/show_pathway?ath00260/ath:AT1G80380%09red
Glyoxylate and dicarboxylate metabolism	KEGG PATHWAY	ath00630	1	74	0.680977	0.825691	Chr05N_MSTRG.38499.2	http://www.genome.jp/kegg-bin/show_pathway?ath00630/ath:AT1G80380%09red
Glycerophospholipid metabolism	KEGG PATHWAY	ath00564	1	86	0.734351	0.872652	Chr09K_Pavir.9KG108500.1.v4.1	http://www.genome.jp/kegg-bin/show_pathway?ath00564/ath:AT5G08030%09red
Phagosome	KEGG PATHWAY	ath04145	1	86	0.734351	0.872652	Chr04K_MSTRG.25576.5	http://www.genome.jp/kegg-bin/show_pathway?ath04145/ath:AT3G14270%09red
Peroxisome	KEGG PATHWAY	ath04146	1	87	0.738374	0.874848	Chr06K_Pavir.6KG413000.2.v4.1	http://www.genome.jp/kegg-bin/show_pathway?ath04146/ath:AT2G28190%09red
Biosynthesis of amino acids	KEGG PATHWAY	ath01230	3	255	0.749712	0.883516	Chr05N_MSTRG.38328.2|Chr09K_MSTRG.60977.2|Chr09K_Pavir.9KG641000.1.v4.1	http://www.genome.jp/kegg-bin/show_pathway?ath01230/ath:AT5G53460%09red/ath:AT4G33680%09red
Cysteine and methionine metabolism	KEGG PATHWAY	ath00270	1	112	0.821388	0.93137	Chr07N_Pavir.7NG301900.1.v4.1	http://www.genome.jp/kegg-bin/show_pathway?ath00270/ath:AT4G11280%09red
mRNA surveillance pathway	KEGG PATHWAY	ath03015	1	114	0.826762	0.935486	Chr08K_MSTRG.53078.3	http://www.genome.jp/kegg-bin/show_pathway?ath03015/ath:AT5G01290%09red
Spliceosome	KEGG PATHWAY	ath03040	1	192	0.947467	1	Chr09K_Pavir.9KG489600.1.v4.1	http://www.genome.jp/kegg-bin/show_pathway?ath03040/ath:AT5G02500%09red
Protein processing in endoplasmic reticulum	KEGG PATHWAY	ath04141	1	212	0.961335	1	Chr09K_Pavir.9KG489600.1.v4.1	http://www.genome.jp/kegg-bin/show_pathway?ath04141/ath:AT5G02500%09red
Carbon metabolism	KEGG PATHWAY	ath01200	1	262	0.982048	1	Chr05N_MSTRG.38499.2	http://www.genome.jp/kegg-bin/show_pathway?ath01200/ath:AT1G80380%09red

## Sheet: Sheet4
Phenylpropanoid biosynthesis	12	4.31188e-07
Plant hormone signal transduction	9	0.02936
Plant-pathogen interaction	8	0.0251811
MAPK signaling pathway - plant	6	0.003
Glutathione metabolism	5	0.00421183
Amino sugar and nucleotide sugar metabolism	5	0.0645524
Fatty acid elongation	4	0.00291724
Zeatin biosynthesis	4	0.000719148
Metabolism of xenobiotics by cytochrome P450	4	0.04
Drug metabolism - cytochrome P450	4	0.03

## Sheet: background
ko01100	3499		柳枝稷的ko
ko01110	1999
ko01130	829
ko01120	648
ko03010	596
ko01200	441
ko04075	441
ko01230	437
ko04141	396
ko03040	384
ko00940	368
ko04626	320
ko05200	315
ko03013	314
ko00230	288
ko04144	283
ko04714	282
ko05170	274
ko05165	265
ko00190	261
ko00520	258
ko05203	256
ko05152	256
ko05016	251
ko04120	250
ko00010	249
ko05010	241
ko04114	234
ko05169	233
ko05418	231
ko00500	231
ko00240	223
ko03015	215
ko04110	215
ko03018	214
ko05225	202
ko04151	198
ko04722	198
ko00480	197
ko00564	197
ko04152	192
ko04910	191
ko05034	191
ko04218	187
ko05012	183
ko05145	183
ko01524	179
ko04010	177
ko00270	176
ko04932	176
ko04016	175
ko04140	171
ko05166	167
ko04111	167
ko04071	164
ko05168	164
ko05164	163
ko04150	159
ko04341	159
ko05167	158
ko00983	155
ko03008	155
ko00620	154
ko04145	153
ko05133	153
ko04922	151
ko04146	149
ko04810	144
ko04068	143
ko05162	140
ko04921	139
ko04621	139
ko04024	137
ko04371	137
ko05231	135
ko03440	135
ko05142	135
ko04666	134
ko04013	134
ko03420	133
ko04142	132
ko05163	132
ko00982	131
ko01212	131
ko04340	131
ko04620	131
ko04113	130
ko00561	129
ko04014	126
ko04310	126
ko00710	124
ko04072	124
ko05230	123
ko04070	123
ko04022	123
ko03030	122
ko00980	121
ko05204	120
ko04261	120
ko04138	119
ko04217	117
ko03050	117
ko00260	116
ko00195	116
ko04530	115
ko00630	113
ko04066	113
ko04914	113
ko05206	110
ko04721	110
ko04211	110
ko00051	109
ko04624	109
ko00030	108
ko00052	108
ko04919	108
ko04723	108
ko05226	108
ko00900	107
ko00680	107
ko04720	107
ko05140	106
ko05134	105
ko04728	105
ko03460	104
ko04212	103
ko04213	103
ko04915	103
ko02024	101
ko05205	100
ko05322	99
ko05161	97
ko04064	97
ko00562	96
ko03430	96
ko04011	95
ko00020	94
ko04912	94
ko00970	94
ko04015	93
ko00330	92
ko00400	92
ko04350	92
ko03060	92
ko04931	91
ko00510	89
ko00280	88
ko04724	88
ko04916	88
ko04360	88
ko01210	87
ko00061	85
ko03022	85
ko00350	84
ko04612	84
ko05210	84
ko04270	83
ko05215	83
ko05110	83
ko03020	83
ko00860	82
ko04510	81
ko05214	81
ko04020	81
ko00250	80
ko04662	80
ko00040	79
ko00360	79
ko00130	78
ko00460	78
ko04380	78
ko05202	78
ko04210	78
ko00071	77
ko04712	77
ko05132	77
ko05131	76
ko00592	75
ko00310	74
ko04370	74
ko04625	74
ko00513	73
ko05212	73
ko00062	72
ko05211	72
ko05160	72
ko00053	71
ko03320	71
ko04928	71
ko04137	71
ko04115	70
ko04650	70
ko04139	69
ko04934	69
ko03410	69
ko04660	69
ko01040	68
ko00410	68
ko04136	68
ko05224	68
ko04130	68
ko01521	67
ko04390	67
ko04962	67
ko04920	66
ko04710	66
ko04062	66
ko00100	65
ko04540	65
ko04391	64
ko00380	63
ko04930	63
ko04520	62
ko00600	61
ko05213	60
ko04727	60
ko04713	60
ko00220	58
ko00941	58
ko04216	58
ko05120	58
ko05031	58
ko05020	57
ko05220	57
ko00910	56
ko04730	56
ko04012	55
ko04664	55
ko04972	54
ko05014	54
ko04657	54
ko04214	54
ko01522	54
ko04550	54
ko00565	53
ko05323	53
ko00920	52
ko04917	52
ko05218	51
ko05223	51
ko00904	50
ko04659	50
ko00640	49
ko00950	49
ko00908	49
ko00073	49
ko04924	49
ko00906	48
ko00563	47
ko04933	47
ko02010	47
ko05130	46
ko04976	45
ko00770	45
ko05221	45
ko04668	45
ko05219	45
ko04658	45
ko05216	44
ko04961	44
ko04623	43
ko04726	43
ko04725	43
ko04926	43
ko04611	42
ko00720	41
ko00780	41
ko00960	41
ko04260	41
ko04750	41
ko04966	40
ko04320	40
ko05146	39
ko00760	38
ko00790	38
ko00730	35
ko05410	35
ko00340	34
ko00650	34
ko05100	34
ko00945	33
ko00511	33
ko04112	33
ko04330	33
ko02020	32
ko04744	32
ko04740	32
ko00300	30
ko00450	30
ko00740	30
ko00531	30
ko04745	30
ko04970	30
ko04960	30
ko04122	29
ko00196	29
ko04918	29
ko04925	29
ko04971	29
ko00290	28
ko00430	27
ko05416	27
ko00909	26
ko02026	26
ko00590	26
ko05222	26
ko03070	26
ko00625	25
ko00670	25
ko00905	25
ko00333	22
ko00261	22
ko05032	22
ko00603	21
ko00902	21
ko00750	20
ko01523	20
ko04973	20
ko04622	20
ko00591	19
ko04940	19
ko04979	19
ko03450	19
ko05033	19
ko00830	18
ko01220	17
ko00643	17
ko04978	17
ko00072	16
ko00521	16
ko00440	15
ko04670	14
ko00903	13
ko00981	13
ko00540	13
ko00401	13
ko00140	13
ko00604	13
ko05217	13
ko04392	13
ko00626	12
ko04630	12
ko04974	12
ko00627	10
ko04711	10
ko04614	10
ko00524	9
ko00785	9
ko04215	9
ko04964	8
ko00660	8
ko05111	8
ko04975	8
ko02025	8
ko00405	8
ko04911	8
ko05143	7
ko00362	6
ko00623	6
ko00364	6
ko00361	6
ko00281	6
ko00944	6
ko04977	6
ko00402	5
ko00514	5
ko00471	4
ko00254	4
ko00232	3
ko01051	3
ko01502	3
ko00550	3
ko00515	3
ko01503	2
ko00532	2
ko00534	2
ko05340	2
ko00966	2
ko00601	2
ko00942	2
ko00523	2
ko00965	2
ko00121	2
ko00791	1
ko01053	1
ko05412	1
ko05414	1
